# Supplementary material
Source: Springer Nature journal article supplement (https://www.springermedizin.de/resource/supplementary/12876_2009_357_MOESM3_ESM.pdf/9439236)

**A**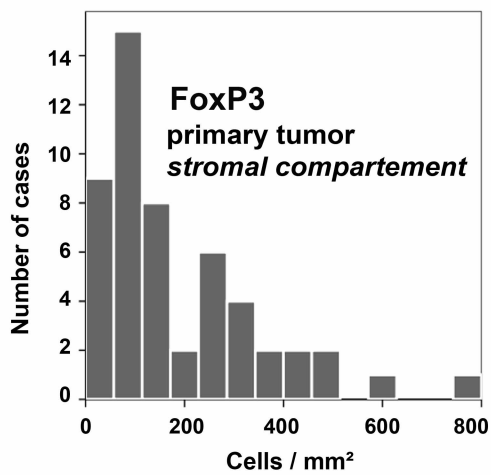**B**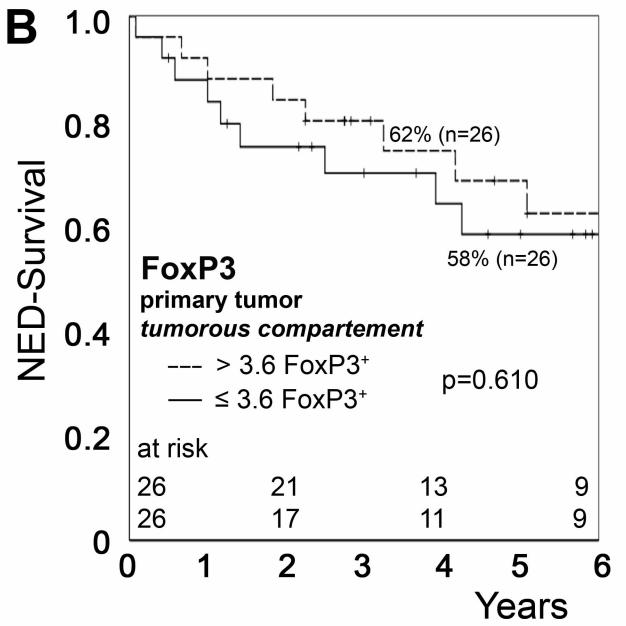**C**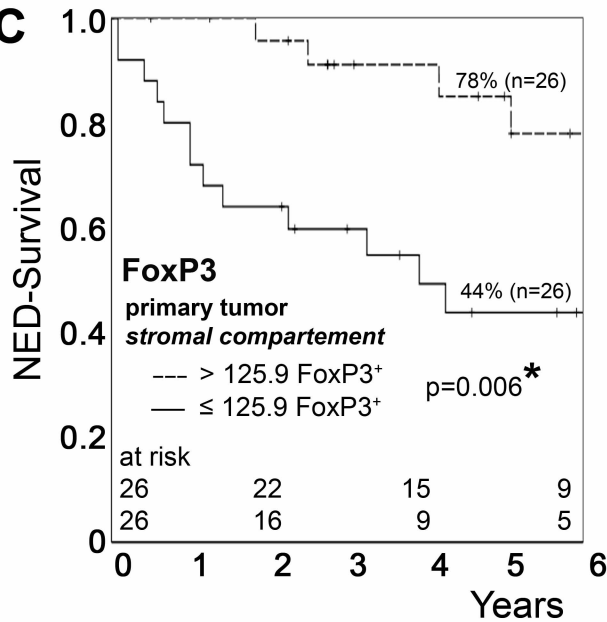**D**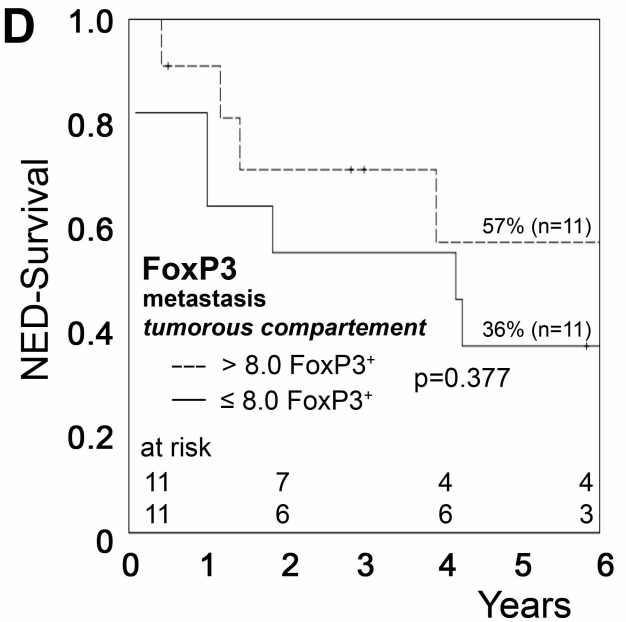**E**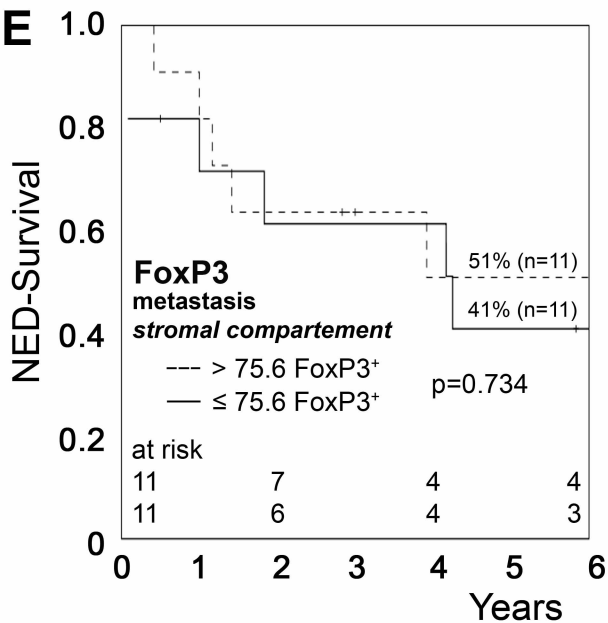**F**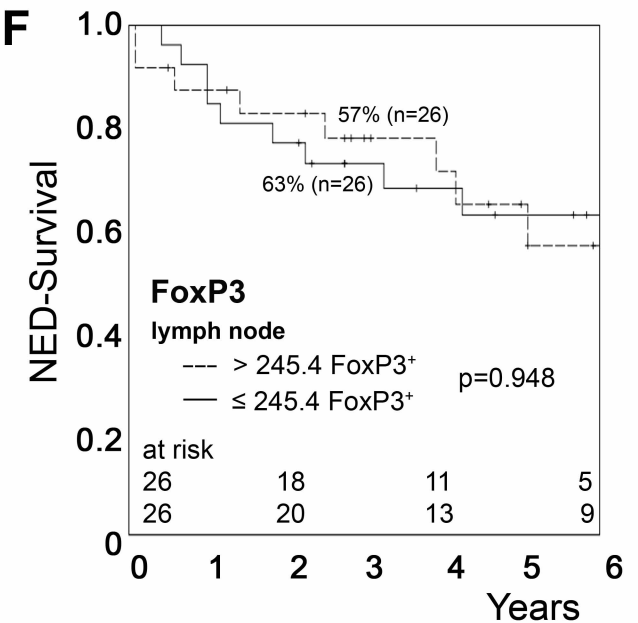

Supplement: MOESM3 [file 9439236]
